# Supplementary material for: Hepatic lipid droplet breakdown through lipolysis during hibernation in Chinese Soft-Shelled Turtle (Pelodiscus sinensis)
Source: PubMed Central journal article supplement (PMC6503876; doi:10.18632/aging.101887), 2019-03-29
Supplement: aging-11-101887-s001.pdf [file aging-11-101887-s001.pdf]

Supplementary Figure

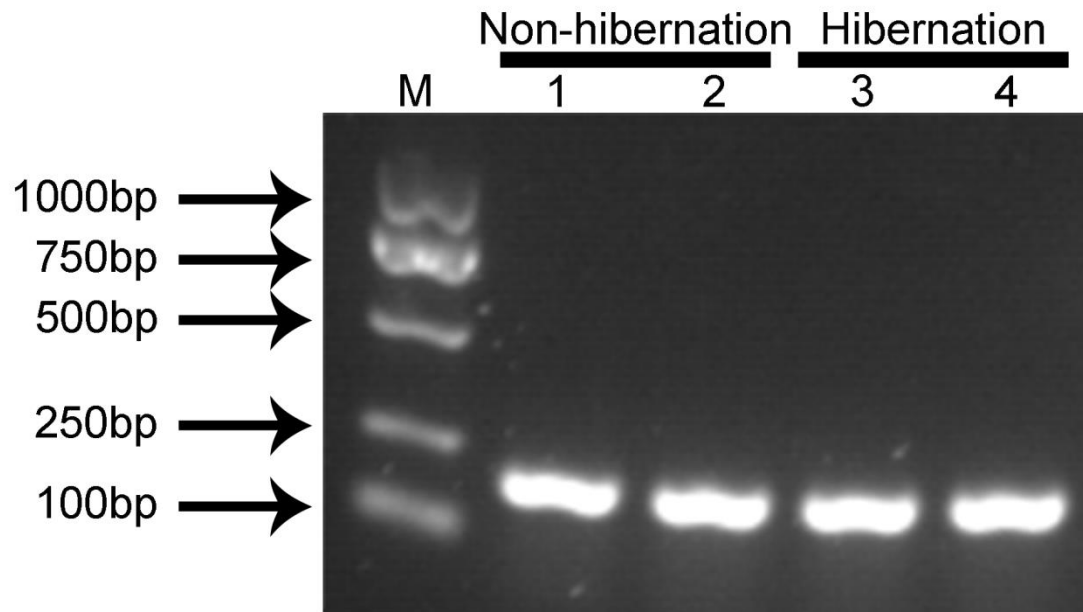

**Supplementary Figure 1.** Agarose gel electrophoresis (AGE) of  $\beta$ -Actin in the liver of Chinese Soft-Shelled Turtle during non-hibernation and hibernation periods. M: DNA marker DL 2000; Lane 1, 2: Non-hibernation; Lane 3, 4: Hibernation.
